# Supplementary material for: Dark-field microscopy for characterization of single molecule dynamicsin vitroandin vivo
Source: Royal Society of Chemistry journal article supplement (doi:10.1039/c8ay02153h), 2019-01-01
Supplement: c8ay02153h2.pdf [file c8ay02153h2.pdf]

**Movie S1.** FM and DM imaging of T4/C4K12 complex at NP=2 ratio.

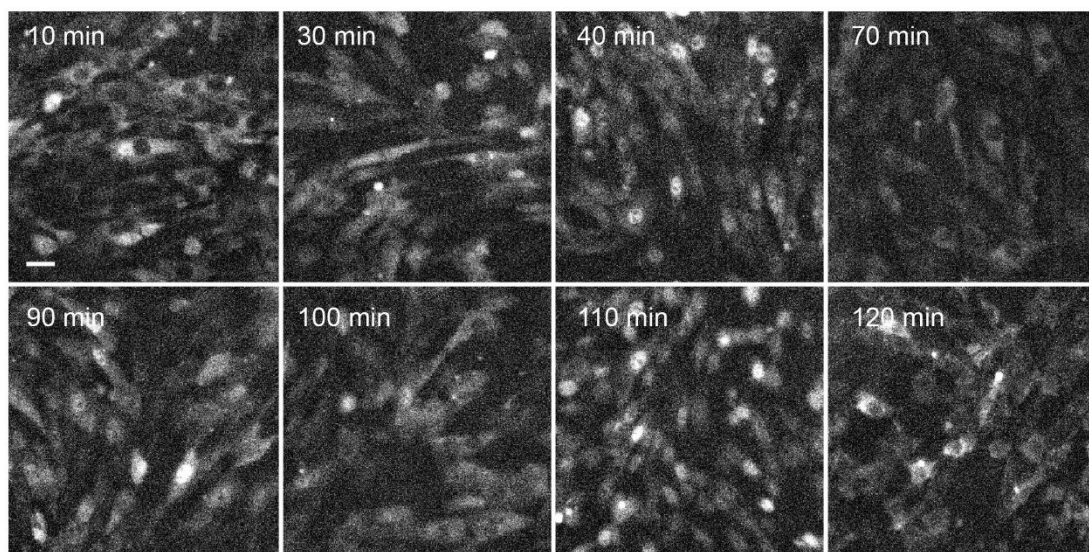

**Figure S1.** NF-kB nuclear localization of 3T3 fibroblasts imaged using fluorescence microscopy. Scale bar denotes 30  $\mu$ m.

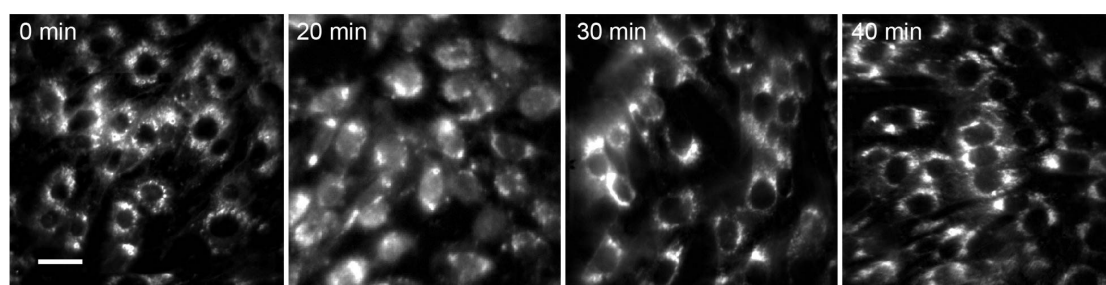

**Figure S2.** NF-kB nuclear localization of 3T3 fibroblasts imaged using darkfield microscopy. Scale bar denotes 30  $\mu$ m.
